# Supplementary material for: Magnetic–dielectric bistabilities and magnetodielectric coupling effects in a new layered hybrid perovskite: (C6H5(CH2)4NH3)2[MnCl4]
Source: Royal Society of Chemistry journal article supplement (doi:10.1039/d2ma00963c), 2022-01-01
Supplement: d2ma00963c1.pdf [file d2ma00963c1.pdf]

## Supporting information

### Magnetic-dielectric bistabilities and magnetodielectric coupling effect in a new layered hybrid perovskite: $(C_6H_5(CH_2)_4NH_3)_2[MnCl_4]$

Bo Huang,<sup>a,b</sup> Ping Wang,<sup>b</sup> Wei-Xiong Zhang<sup>\*,a</sup>, Xiao-Ming Chen<sup>a</sup>

<sup>a</sup> MOE Key Laboratory of Bioinorganic and Synthetic Chemistry, School of Chemistry, Sun Yat-Sen University, Guangzhou, 510275, P. R. China.

<sup>b</sup> Faculty of Chemistry and Chemical Engineering, Yunnan Normal University, Kunming, 650500, P. R. China.

#### Contents

|                                                                                                 |           |
|-------------------------------------------------------------------------------------------------|-----------|
| 1. <b>Fig. S1</b> Photo of a crystal of <b>1</b> view along the <i>c</i> axis .....             | <b>S2</b> |
| 2. <b>Fig. S2</b> Experimental powder X-ray diffraction patterns .....                          | <b>S2</b> |
| 3. <b>Fig. S3</b> Thermogravimetric curve .....                                                 | <b>S2</b> |
| 4. <b>Fig. S4</b> Two heating-cooling circles of differential scanning calorimetry curves ..... | <b>S2</b> |
| 5. <b>Fig. S5</b> Inorganic layers of <b>1</b> .....                                            | <b>S3</b> |
| 6. <b>Table S1</b> Summary of crystal data and structural refinements .....                     | <b>S3</b> |
| 7. <b>Table S2</b> Selected bond lengths .....                                                  | <b>S4</b> |
| 8. <b>Table S3</b> Selected angles .....                                                        | <b>S4</b> |
| 9. <b>Table S4</b> The geometry of hydrogen bonds .....                                         | <b>S5</b> |

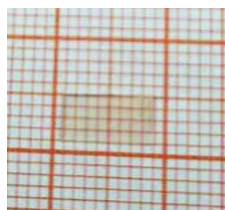

**Fig. S1** Photo of a crystal of **1** viewed along the *c* axis.

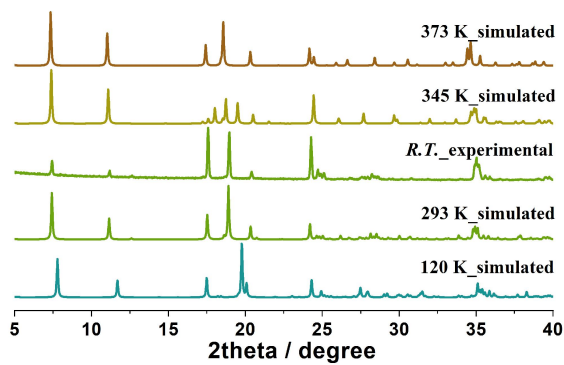

**Fig. S2** Experimental powder X-ray diffraction patterns compared with the simulated one.

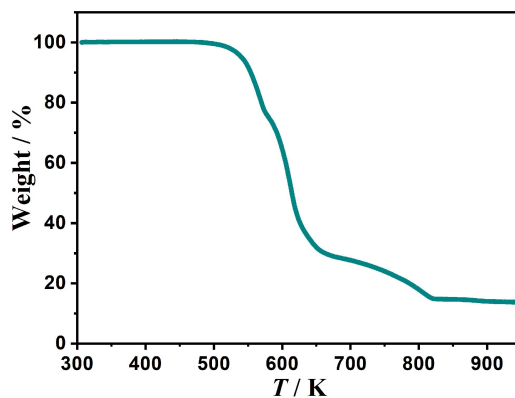

**Fig. S3** Thermogravimetric curve of **1** under  $N_2$  atmosphere at a heating rate of 5 K/min.

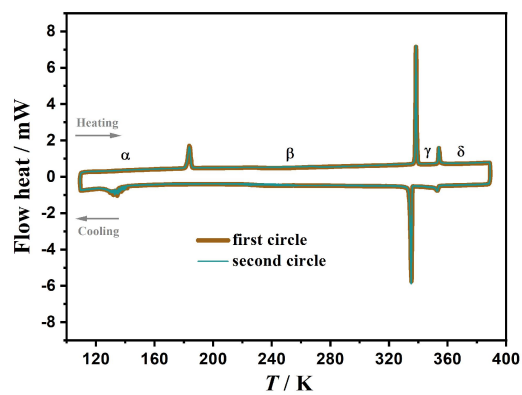

**Fig. S4** Two heating-cooling circles of differential scanning calorimetry curves for **1**.

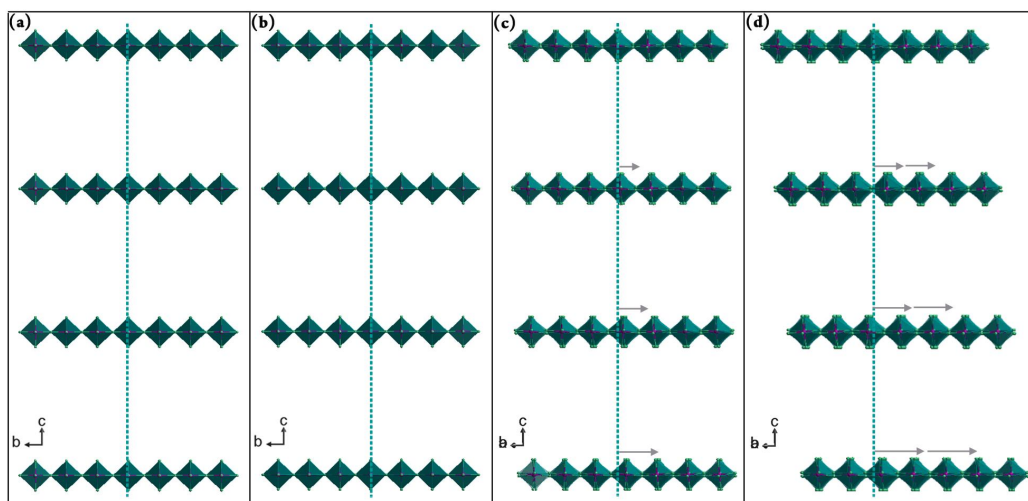

**Fig. S5** Inorganic layers of **1** at 373 K (a), 345 K (b), 293 K (c), and 120 K (d). Mn and Cl atoms are shaded in violet and green. The teal dotted lines are guide to the relative displacement of the inorganic layers. The grey arrows represent the direction of the relative movement.

**Table S1.** Summary of crystal data and structural refinements of **1** at 120, 293, 345, and 373 K.

| Empirical formula                     | $C_{20}H_{32}N_2MnCl_4$ |                |                |                |
|---------------------------------------|-------------------------|----------------|----------------|----------------|
| Formula weight                        | 497.22                  |                |                |                |
| $T / K$                               | 120(2)                  | 293(2)         | 345(2)         | 373(2)         |
| Phase type                            | $\alpha$                | $\beta$        | $\gamma$       | $\delta$       |
| Space group                           | $P2_1/a$                | $P2_1/a$       | $Bmmm$         | $P4/mmm$       |
| $a / \text{\AA}$                      | 7.1398(5)               | 7.2244(4)      | 5.1706(4)      | 5.2046(4)      |
| $b / \text{\AA}$                      | 7.3173(6)               | 7.3495(4)      | 5.1534(4)      | 5.2046(4)      |
| $c / \text{\AA}$                      | 22.892(2)               | 23.812(1)      | 47.842(2)      | 24.06(2)       |
| $\beta / \text{degree}$               | 82.472(2)               | 88.311(1)      | 90             | 90             |
| $V / \text{\AA}^3$                    | 1185.7(2)               | 1263.8(1)      | 1274.8(2)      | 651.77(8)      |
| $Z$                                   | 2                       | 2              | 2              | 1              |
| $D_{\text{calcd}} / \text{g cm}^{-3}$ | 1.393                   | 1.307          | 1.295          | 1.267          |
| $\mu / \text{mm}^{-1}$                | 1.016                   | 0.953          | 0.945          | 0.924          |
| GOF                                   | 1.034                   | 1.016          | 0.959          | 1.016          |
| $R_1, wR_2 [I > 2\sigma(I)]^a$        | 0.0418, 0.0997          | 0.0338, 0.0831 | 0.0655, 0.1536 | 0.0507, 0.1105 |
| $R_1, wR_2$ (all data)                | 0.0513, 0.1058          | 0.0457, 0.0902 | 0.0900, 0.1726 | 0.0696, 0.1199 |

$$^a R_1 = F_o - F_c / F_o, wR_2 = \{w[(F_o)^2 - (F_c)^2] / w[(F_o)^2]\}^{1/2}$$

**Table S2.** Selected bond lengths (Å) for **1** at 120, 293, 345, and 373 K.

| 120 K   |            |         |           |                      |           |
|---------|------------|---------|-----------|----------------------|-----------|
| Mn1–Cl1 | 2.5122(5)  | Mn1–Cl2 | 2.5745(5) | Mn1–Cl2 <sup>A</sup> | 2.5874(5) |
| 293 K   |            |         |           |                      |           |
| Mn1–Cl1 | 2.4889(6)  | Mn1–Cl2 | 2.5878(5) | Mn1–Cl2 <sup>A</sup> | 2.5968(5) |
| 345 K   |            |         |           |                      |           |
| Mn1–Cl1 | 2.4544(19) | Mn1–Cl2 | 2.5767(2) | Mn1–Cl3              | 2.5853(2) |
| 373 K   |            |         |           |                      |           |
| Mn1–Cl1 | 2.457(4)   | Mn1–Cl2 | 2.6023(2) |                      |           |

Symmetry codes: <sup>A</sup>)-1/2-x, -1/2+y, 1-z**Table S3.** Selected angles (°) for **1** at 120, 293, 345, and 373 K.

| 120 K                                  |            |                                        |            |                                        |            |
|----------------------------------------|------------|----------------------------------------|------------|----------------------------------------|------------|
| Cl1–Mn1–Cl1 <sup>A</sup>               | 180.000(4) | Cl1–Mn1–Cl2                            | 91.085(17) | Cl1–Mn1–Cl2 <sup>A</sup>               | 88.915(17) |
| Cl1–Mn1–Cl2 <sup>B</sup>               | 88.916(17) | Cl1 <sup>A</sup> –Mn1–Cl2 <sup>A</sup> | 91.085(17) | Cl1 <sup>A</sup> –Mn1–Cl2 <sup>B</sup> | 91.084(17) |
| Cl2–Mn1–Cl2 <sup>A</sup>               | 180.00(2)  | Cl2–Mn1–Cl2 <sup>B</sup>               | 87.978(7)  | Cl2–Mn1–Cl2 <sup>C</sup>               | 92.022(7)  |
| Cl2 <sup>B</sup> –Mn1–Cl2 <sup>C</sup> | 180.000(1) | Mn1–Cl2–Mn1 <sup>C</sup>               | 164.02(2)  |                                        |            |
| 293 K                                  |            |                                        |            |                                        |            |
| Cl1–Mn1–Cl1 <sup>A</sup>               | 180        | Cl1–Mn1–Cl2                            | 90.548(19) | Cl1–Mn1–Cl2 <sup>A</sup>               | 89.452(19) |
| Cl1–Mn1–Cl2 <sup>B</sup>               | 88.582(19) | Cl1–Mn1–Cl2 <sup>C</sup>               | 91.418(19) | Cl2–Mn1–Cl2 <sup>A</sup>               | 180.000    |
| Cl2–Mn1–Cl2 <sup>B</sup>               | 88.502(5)  | Cl2–Mn1–Cl2 <sup>C</sup>               | 91.498(5)  | Cl2 <sup>A</sup> –Mn1–Cl2 <sup>C</sup> | 88.502(5)  |
| Mn1–Cl2–Mn1 <sup>D</sup>               | 167.31(3)  |                                        |            |                                        |            |
| 345 K                                  |            |                                        |            |                                        |            |
| Cl1–Mn1–Cl1 <sup>A</sup>               | 180        | Cl1–Mn1–Cl2                            | 90         | Cl1–Mn1–Cl3                            | 180        |
| Cl2–Mn1–Cl2 <sup>B</sup>               | 180        | Cl2–Mn1–Cl3                            | 90         | Cl3–Mn1–Cl3 <sup>C</sup>               | 180        |
| Mn1–Cl2–Mn1 <sup>D</sup>               | 180        | Mn1–Cl3–Mn1 <sup>E</sup>               | 180        |                                        |            |
| 373 K                                  |            |                                        |            |                                        |            |
| Cl1–Mn1–Cl1 <sup>A</sup>               | 180        | Cl1–Mn1–Cl2                            | 90         | Cl2–Mn1–Cl2 <sup>B</sup>               | 90         |
| Cl2–Mn1–Cl2 <sup>C</sup>               | 180        | Mn1–Cl2–Mn1                            | 180        |                                        |            |

Symmetry codes:

120 K: <sup>A</sup>) -1-x, 2-y, 1-z; <sup>B</sup>) -1/2+x, 5/2-y, z; <sup>C</sup>) -1/2-x, -1/2+y, 1-z;293 K: <sup>A</sup>) -1-x, 2-y, 1-z; <sup>B</sup>) -1/2+x, 3/2-y, z; <sup>C</sup>) -1/2-x, 1/2+y, 1-z; <sup>D</sup>) -1/2-x, -1/2+y, 1-z;353 K: <sup>A</sup>) -x, -y, -z; <sup>B</sup>) x, -1+y, z; <sup>C</sup>) 1+x, y, z; <sup>D</sup>) x, 1+y, z; <sup>E</sup>) -1+x, y, z;373 K: <sup>A</sup>) -x, -y, -z; <sup>B</sup>) -y, x, z; <sup>C</sup>) 1+x, y, z

**Table S4.** The geometry (Å, °) of hydrogen bonds for **1** at 120, 293, 345, and 373 K.

|       | D–H···A                   | D–H   | H···A | D···A | ∠D–H···A |
|-------|---------------------------|-------|-------|-------|----------|
| 120 K | N1–H1A···Cl2              | 0.943 | 2.357 | 3.253 | 158.51   |
|       | N1–H1B···Cl1              | 0.943 | 2.297 | 3.224 | 167.75   |
|       | N1–H1C···Cl1              | 0.952 | 2.342 | 3.274 | 166.12   |
| 293 K | N1–H1A···Cl1              | 0.890 | 2.391 | 3.274 | 171.73   |
|       | N1–H1B···Cl2 <sup>A</sup> | 0.890 | 2.439 | 3.317 | 168.75   |
|       | N1–H1C···Cl1 <sup>B</sup> | 0.890 | 2.602 | 3.402 | 149.88   |
|       | N1–H1C···Cl2 <sup>C</sup> | 0.890 | 2.770 | 3.384 | 127.27   |
| 345 K | N1–H1A···Cl2 <sup>A</sup> | 0.890 | 2.784 | 3.578 | 149.27   |
|       | N1–H1A···Cl3 <sup>B</sup> | 0.890 | 2.733 | 3.309 | 123.61   |
|       | N1–H1B···Cl1 <sup>C</sup> | 0.890 | 2.564 | 3.407 | 158.39   |
|       | N1–H1B···Cl2              | 0.890 | 2.817 | 3.325 | 117.68   |
|       | N1–H1C···Cl1              | 0.890 | 2.973 | 3.671 | 136.69   |
|       | N1–H1C···Cl3 <sup>A</sup> | 0.890 | 2.855 | 3.581 | 139.70   |
| 373 K | N1–H1A···Cl1 <sup>A</sup> | 0.890 | 2.673 | 3.463 | 148.53   |
|       | N1–H1A···Cl2 <sup>B</sup> | 0.890 | 2.708 | 3.296 | 124.69   |
|       | N1–H1B···Cl2 <sup>A</sup> | 0.890 | 2.888 | 3.382 | 116.69   |
|       | N1–H1B···Cl1 <sup>C</sup> | 0.890 | 2.905 | 3.770 | 164.32   |
|       | N1–H1C···Cl2 <sup>D</sup> | 0.890 | 2.648 | 3.537 | 175.84   |

Symmetry codes:

120 K: <sup>A</sup>)  $x, -y+3/2, z-1/2, z$ ; <sup>B</sup>)  $x, y, z-1$ ;293 K: <sup>A</sup>)  $x-1/2, -y+5/2, z$ ; <sup>B</sup>)  $x+1/2, -y+5/2, z$ ; <sup>C</sup>)  $x, y+1, z$ ;345 K: <sup>A</sup>)  $x+1, y, z$ ; <sup>B</sup>)  $x+1, y+1, z$ ; <sup>C</sup>)  $x, y+1, z$ ;373 K: <sup>A</sup>)  $x+1, y+1, z$ ; <sup>B</sup>)  $-y+1, x+1, z$ ; <sup>C</sup>)  $x, y+1, z$ ; <sup>D</sup>)  $x+1, y, z$
